# Supplementary material
Source: publisher site journal article supplement (https://www.dovepress.com/article/227036)
Supplement: Supplementary file 1 [file get_supplementary_file.php]

**Supplementary Table 1** Primer sequences used for dual luciferase reporter gene assay

| SETDB2 promoter fragments | Forward (5'→3')          | Reverse (5'→3')          |
|---------------------------|--------------------------|--------------------------|
| SETDB2-full               | CCCAAACGCAGAACTTGACG     | GGTCCGGAGAGAACAATGGG     |
| SETDB2-P1                 | TGTTTCTCCATGCATTTTGACAAG | TGATTCCATGCTTGTATCTTCCAC |
| SETDB2-P2                 | ATTCCTGATGCGAGATGTCTT    | TGCATGAAAAGAAAGCCGATGT   |
| SETDB2-P3                 | TCCTGCTCCATGAAGTGACC     | GGCGTCAAGTTCTGCGTTTG     |
| SETDB2-P4                 | GAGCTCCAGGAACCAATGT      | ACTTGCGGAAAGGATGGGTT     |
